# Supplementary material
Source: PubMed Central journal article supplement (PMC10564536)
Supplement: NIHPP2023.01.12.523861V2-supplement-1.pdf [file NIHPP2023.01.12.523861V2-supplement-1.pdf]

## Supplemental Figures

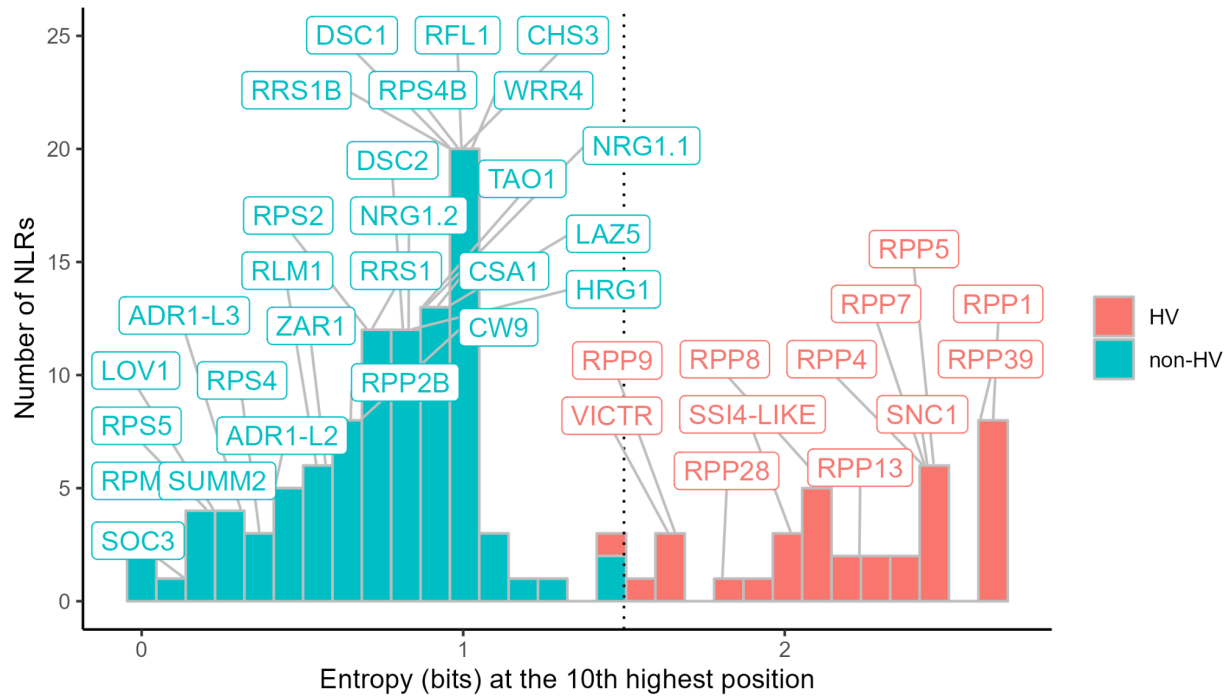

**Supplemental Figure 1:** Distribution of NLR Shannon entropy at the tenth highest amino acid position as shown as a histogram with 30 bins. Described NLRs are annotated. The designation of hvNLR is entropy of  $>1.5$  bits at the tenth highest position, as shown by the dashed line.

A.

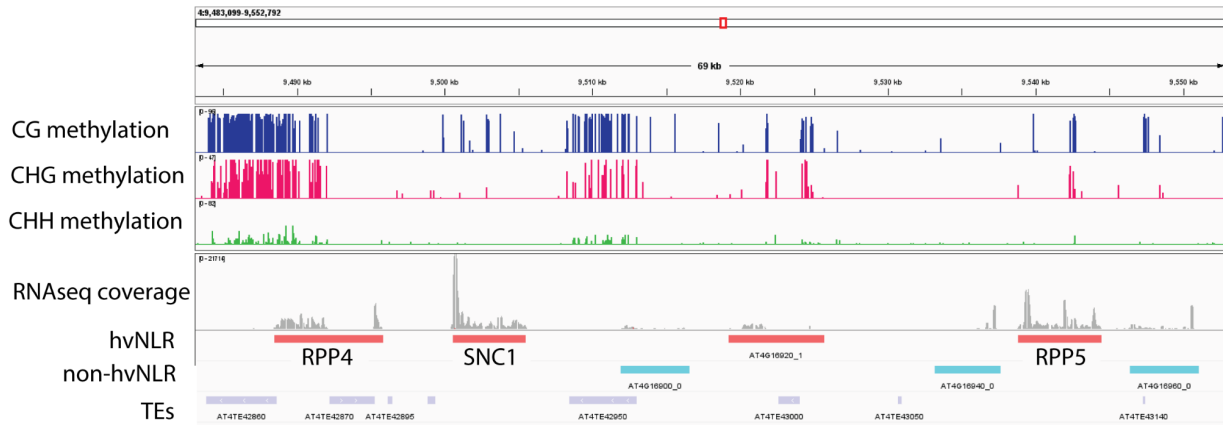

B.

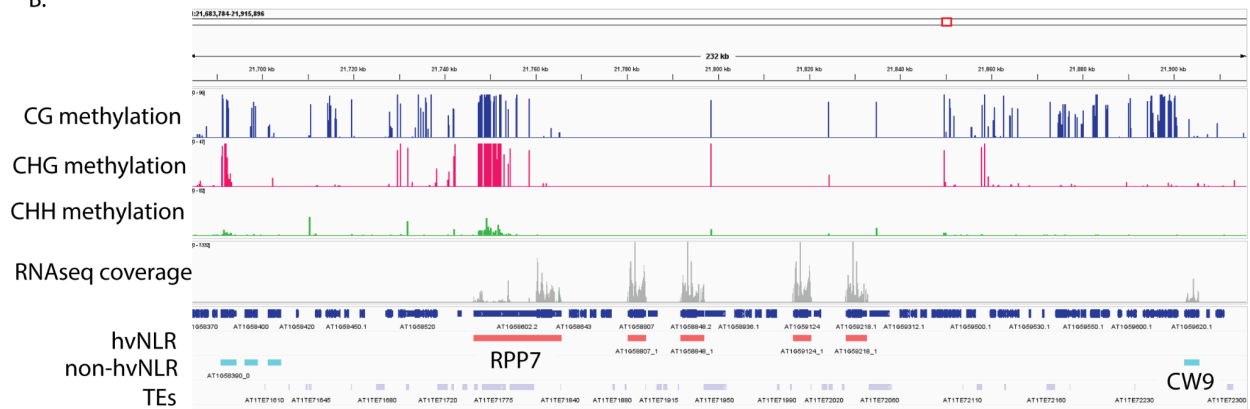

**Supplemental Figure 2:** Integrative Genomics Viewer screenshot of Methylation, RNAseq coverage, and TE proximity of the **A.** *RPP4* and **B.** *RPP7* clusters.

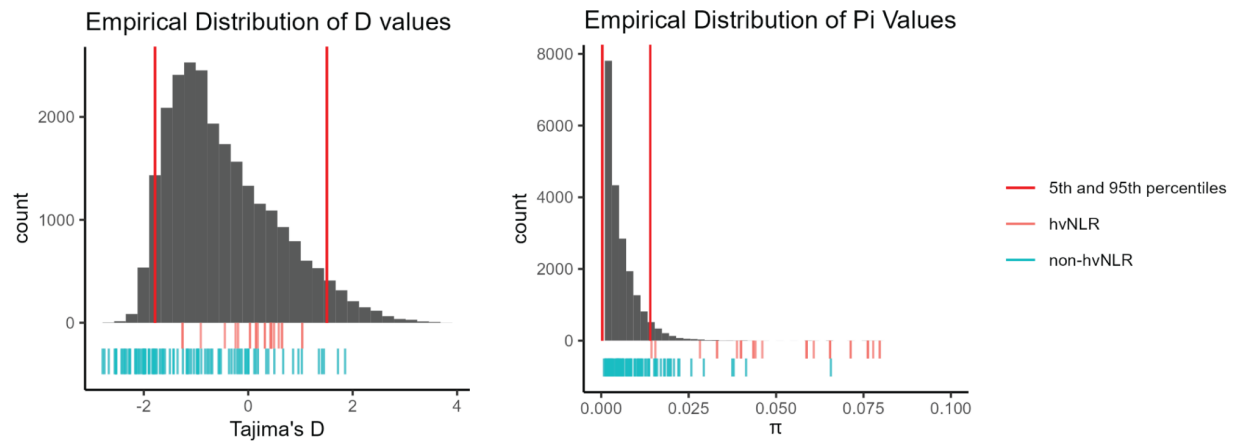

**Supplemental Figure 3:** Empirical distribution of Tajima's D and  $\pi$  calculated on coding sequences of *Arabidopsis*. Position of hv and non-hvNLRs shown via rug plot, as well as the 5th and 95th percentiles of the distribution.

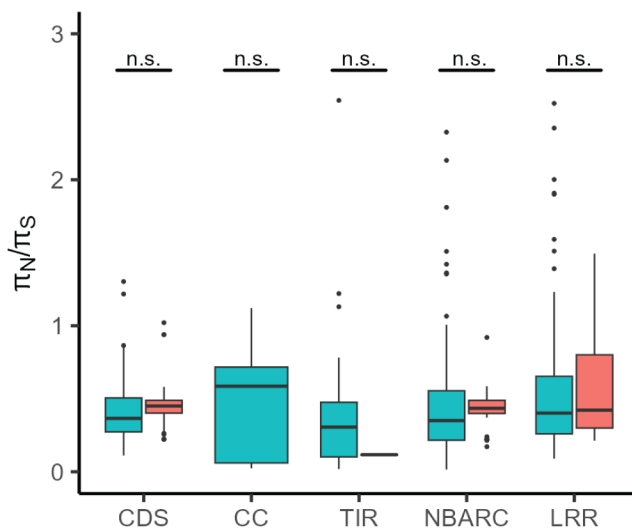

**Supplemental Figure 4:**  $\pi_N/\pi_S$  calculated per domain.
